# Supplementary material
Source: Springer Nature journal article supplement (https://www.springermedizin.de/resource/supplementary/12936_2007_424_MOESM2_ESM.pdf/9547416)
Supplement: MOESM2 [file 9547416]

| The Host         | The Parasite     | The Drug                                  |
|------------------|------------------|-------------------------------------------|
| Age              | Biomass          | Pharmacokinetic / pharmacodynamic profile |
| Immunity         | Polyclonality    | Formulation                               |
| Pregnancy        | Mixed Infections | Tolerability profile                      |
| Nutrition        | Sequestration    | Dosage and duration of treatment          |
| Adherence        | Synchrony        | Drug quality                              |
| Pharmacogenetics | Resistance       |                                           |
